# Supplementary material for: Deep sequencing and de novo assembly of the mouse oocyte transcriptome define the contribution of transcription to the DNA methylation landscape
Source: PubMed Central journal article supplement (PMC4582738; doi:10.1186/s13059-015-0769-z), 2015-09-25
Supplement: 13059_2015_769_MOESM2_ESM.pdf [file 13059_2015_769_MOESM2_ESM.pdf]

## **ADDITIONAL FILE 2: Supplementary Tables**

**Deep sequencing and *de novo* assembly of the mouse oocyte transcriptome define the contribution of transcription to the DNA methylation landscape.**

Veselovska L<sup>\*1</sup>, Smallwood SA<sup>\*1</sup>, Saadeh H<sup>1,2</sup>, Stewart K<sup>1</sup>, Krueger F<sup>2</sup>, Maupetit-Méhouas S<sup>3</sup>, Arnaud P<sup>3</sup>, Tomizawa S-I<sup>4</sup>, Andrews S<sup>2</sup>, Kelsey G<sup>1,5</sup>.

**Table S1: Comparison of the oocyte transcriptome to the reference annotation using Cuffcompare**

| <b>Cuffcompare category</b> | <b>Known of novel isoform of</b> | <b>All transcripts</b> | <b>Multiexonic transcripts</b> | <b>Monoexonic transcripts</b> |
|-----------------------------|----------------------------------|------------------------|--------------------------------|-------------------------------|
| =                           | reference genes                  | 21682                  | 21070                          | 612                           |
| c                           | reference genes                  | 1334                   | 1075                           | 259                           |
| j                           | reference genes                  | 27855                  | 27855                          | 0                             |
| e                           |                                  | 213                    | 0                              | 213                           |
| i                           | novel genes                      | 3950                   | 1621                           | 2329                          |
| o                           | reference genes*                 | 1840                   | 1447                           | 393                           |
| p                           |                                  | 193                    | 0                              | 193                           |
| r                           |                                  | 0                      | 0                              | 0                             |
| u                           | novel genes                      | 22830                  | 11615                          | 11215                         |
| x                           | novel genes                      | 2843                   | 2230                           | 613                           |
| s                           |                                  | 8                      | 8                              | 0                             |
| not listed**                |                                  | 191                    | 191                            | 0                             |

\*category o contains transcripts with the exonic overlap on the same strand with the reference transcripts. If exonic sequence is shared between two transcripts, they might be different isoforms of the same transcriptional unit.

\*\* oocyte transcripts not listed in the Cuffcompare output share the same splice sites and exons with transcripts listed in the output, but have shorter 5' end of the first exon or 3' end of the last exon.

**Table S2: List of RNA-Seq and BS-Seq published dataset used in this study**

|                             | Cell type                       | No of datasets | PMID                 | GEO accession                                                               | PolyA selection/<br>rRNA depletion | Strand-<br>specificity<br>of the<br>library | Reference                       |
|-----------------------------|---------------------------------|----------------|----------------------|-----------------------------------------------------------------------------|------------------------------------|---------------------------------------------|---------------------------------|
| RNA-seq                     | fully grown oocytes             | 2              | 22242016             | DRR001701, DRR001702                                                        | polyA selected                     | no                                          | Kobayashi et al., 2012          |
|                             | fully grown oocytes             | 3              | 22722858             | SRR385625, SRR385626, SRR385627                                             | polyA selected                     | no                                          | Macfarlan et al., 2012          |
|                             | fully grown oocytes             | 6              | 24352427             | DRR013128, DRR013129, DRR013130, DRR013131, DRR013132, DRR013133            | rRNA depleted                      | yes                                         | Park et al., 2013               |
|                             | fully grown oocytes             | 3              | 22820318             | SRR522060, SRR522061, DRR522062                                             | polyA selected                     | no                                          | Ramskold et al., 2012           |
|                             | growing and fully grown oocytes | 2              | 21706000             | ERR034795, ERR034797                                                        | polyA selected                     | no                                          | Smallwood et al., 2011          |
|                             | fully grown oocytes             | 2              | 21731673             | SRR057540, SRR057541                                                        | polyA selected                     | no                                          | Tang et al., 2011               |
|                             | fully grown oocytes             | 2              | 23892778             | SRR689233, SRR689234                                                        | polyA selected                     | no                                          | Xue et al., 2013                |
|                             | fully grown oocytes             | 2              | 23892778             | SRR689233, SRR689234                                                        | polyA selected                     | no                                          | Xue et al., 2013                |
|                             | E13.5 and E16.5 female PGCs     | 2              | 23219530             | ERR192342, ERR192343                                                        | polyA selected                     | no                                          | Seisenberger et al., 2012       |
|                             | zygote                          | 4              | 24408435             | GSE45719                                                                    | polyA selected                     | no                                          | Deng et al., 2014               |
|                             | zygote                          | 5              | 24352427             | DRR013134, DRR013135, DRR013136, DRR013137, DRR013138                       | rRNA depleted                      | yes                                         | Park et al., 2013               |
|                             | zygote                          | 3              | 23892778             | SRR689235, SRR689236, SRR689237                                             | polyA selected                     | no                                          | Xue et al., 2013                |
|                             | 2C embryo                       | 4              | 24408435             | GSE45719                                                                    | polyA selected                     | no                                          | Deng et al., 2014               |
|                             | 2C embryo                       | 3              | 22722858             | SRR385622, SRR385623, SRR385624                                             | polyA selected                     | no                                          | Macfarlan et al., 2014          |
|                             | 2C embryo                       | 5              | 24352427             | DRR013139, DRR013140, DRR013141, DRR013142, DRR013143                       | rRNA depleted                      | yes                                         | Park et al., 2013               |
|                             | 2C embryo                       | 3              | 23892778             | SRR689238, SRR689239, SRR689240                                             | polyA selected                     | no                                          | Xue et al., 2013                |
|                             | 4C embryo                       | 4              | 24408435             | GSE45719                                                                    | polyA selected                     | no                                          | Deng et al., 2014               |
|                             | 4C embryo                       | 5              | 24352427             | DRR013144, DRR013145, DRR013146, DRR013147, DRR013148                       | rRNA depleted                      | yes                                         | Park et al., 2013               |
|                             | 4C embryo                       | 3              | 23892778             | SRR689241, SRR689242, SRR689243                                             | polyA selected                     | no                                          | Xue et al., 2013                |
|                             | 8C embryo                       | 4              | 24408435             | GSE45719                                                                    | polyA selected                     | no                                          | Deng et al., 2014               |
|                             | 8C embryo                       | 3              | 23892778             | SRR689244, SRR689245, SRR689246                                             | polyA selected                     | no                                          | Xue et al., 2013                |
|                             | morula                          | 4              | 24408435             | GSE45719                                                                    | polyA selected                     | no                                          | Deng et al., 2014               |
|                             | morula                          | 3              | 23892778             | SRR689247, SRR689248, SRR689249                                             | polyA selected                     | no                                          | Xue et al., 2013                |
|                             | brown adipose tissue            | 2              | 22989292             | SRR496219, SRR496220                                                        | n/a                                | yes                                         | Stamatoyannopoulos et al., 2012 |
|                             | bone marrow                     | 2              | 22989292             | SRR496247, SRR496248                                                        | n/a                                | yes                                         | Stamatoyannopoulos et al., 2012 |
|                             | cerebellum                      | 2              | 22989292             | SRR496231, SRR496232                                                        | n/a                                | yes                                         | Stamatoyannopoulos et al., 2012 |
|                             | cortex                          | 2              | 22989292             | SRR496229, SRR496230                                                        | n/a                                | yes                                         | Stamatoyannopoulos et al., 2012 |
|                             | heart                           | 2              | 22989292             | SRR496227, SRR496228                                                        | n/a                                | yes                                         | Stamatoyannopoulos et al., 2012 |
|                             | kidney                          | 2              | 22989292             | SRR496225, SRR496226                                                        | n/a                                | yes                                         | Stamatoyannopoulos et al., 2012 |
|                             | liver                           | 2              | 22989292             | SRR496235, SRR496236                                                        | n/a                                | yes                                         | Stamatoyannopoulos et al., 2012 |
| lung                        | 2                               | 22989292       | SRR496233, SRR496234 | n/a                                                                         | yes                                | Stamatoyannopoulos et al., 2012             |                                 |
| spleen                      | 2                               | 22989292       | SRR496253, SRR496254 | n/a                                                                         | yes                                | Stamatoyannopoulos et al., 2012             |                                 |
| embryonic stem cells        | 2                               | 22989292       | SRR496249, SRR496250 | n/a                                                                         | yes                                | Stamatoyannopoulos et al., 2012             |                                 |
| mouse embryonic fibroblasts | 2                               | 22989292       | SRR496251, SRR496252 | n/a                                                                         | yes                                | Stamatoyannopoulos et al., 2012             |                                 |
| BS-seq                      | fully grown oocytes             | 7              | 23637617             | DRR002141, DRR003599, DRR003600, DRR003601, DRR003602, DRR003603, DRR003604 | n/a                                | n/a                                         | Shirane et al., 2013            |
|                             | non-growing oocytes             | 5              | 23637617             | DRR002157, DRR002158, DRR002159, DRR002160, DRR002161                       | n/a                                | n/a                                         | Shirane et al., 2013            |
|                             | DNMT3A-deficient oocytes        | 3              | 23637617             | DRR002145, DRR002146, DRR002147                                             | n/a                                | n/a                                         | Shirane et al., 2013            |
|                             | DNMT3L-deficient oocytes        | 1              | 23637617             | DRR002151                                                                   | n/a                                | n/a                                         | Shirane et al., 2013            |
|                             | sperm                           | 17             | 22242016             | DRR001664-DRR001679                                                         | n/a                                | n/a                                         | Kobayashi et al., 2012          |

**Table S3: List of expressed genes that escape DNAm targeting in oocytes**

| ID            | Gene Name                                                                             |
|---------------|---------------------------------------------------------------------------------------|
| Cd59b         | CD59b antigen                                                                         |
| DOH4S114      | DNA segment, human D4S114                                                             |
| Epha7         | Eph receptor A7                                                                       |
| Isl1          | ISL1 transcription factor, LIM/homeodomain                                            |
| Pdlim3        | PDZ and LIM domain 3                                                                  |
| Rasa3         | RAS p21 protein activator 3                                                           |
| 1110007C09Rik | RIKEN cDNA 1110007C09 gene                                                            |
| Fam165b       | RIKEN cDNA 1190017O12 gene                                                            |
| Rwdd4a        | RWD domain containing 4A                                                              |
| Sox13         | SRY-box containing gene 13                                                            |
| Ankmy2        | ankyrin repeat and MYND domain containing 2                                           |
| Asns          | asparagine synthetase                                                                 |
| Bzw2          | basic leucine zipper and W2 domains 2                                                 |
| Fgl1          | fibrinogen-like protein 1                                                             |
| Fgf16         | fibroblast growth factor 16                                                           |
| Fstl1         | folliculin-like 1                                                                     |
| Foxo6         | forkhead box O6                                                                       |
| Fut10         | fucosyltransferase 10                                                                 |
| H6pd          | hexose-6-phosphate dehydrogenase (glucose 1-dehydrogenase)                            |
| Hmgn3         | high mobility group nucleosomal binding domain 3                                      |
| Hadh          | hydroxyacyl-Coenzyme A dehydrogenase                                                  |
| Krt79         | keratin 79                                                                            |
| Mfap3l        | microfibrillar-associated protein 3-like                                              |
| Nudt15        | nudix (nucleoside diphosphate linked moiety X)-type motif 15                          |
| Pax6          | paired box gene 6                                                                     |
| Gm5595        | predicted gene 5595; predicted gene 2381                                              |
| Shisa6        | predicted gene 879                                                                    |
| Tpst1         | protein-tyrosine sulfotransferase 1                                                   |
| Styx1         | serine/threonine/tyrosine interacting-like 1                                          |
| Rap2c         | similar to RAP2C, member of RAS oncogene family; RAP2C, member of RAS oncogene family |
| Slit3         | slit homolog 3 (Drosophila)                                                           |
| Sohlh2        | spermatogenesis and oogenesis specific basic helix-loop-helix 2                       |
| Stc2          | stanniocalcin 2                                                                       |
| Syce1         | synaptonemal complex central element protein 1                                        |
| Tes           | testis derived transcript                                                             |
| Tcf4          | transcription factor 4                                                                |
| Tmem56        | transmembrane protein 56                                                              |
| Ttyh2         | tweety homolog 2 (Drosophila); similar to tweety homolog 2                            |
| Vps36         | vacuolar protein sorting 36 (yeast)                                                   |
| Zbtb38        | zinc finger and BTB domain containing 38                                              |
| Zfp219        | zinc finger protein 219                                                               |

**Table S4: List of primer sequences and locations used for for RT-PCR validation**

| Name* | Forward primer sequence 5'->3' | Reverse primer sequence 5'->3' | Chr | 5' end forward primer | 5' end reverse primer | Exon number forward primer** | Exon number reverse primer** |
|-------|--------------------------------|--------------------------------|-----|-----------------------|-----------------------|------------------------------|------------------------------|
| T1    | ACTGAAAGTGGTGCCATCCC           | TCCTGCTCGTCCTTTGTGAT           | 10  | 4353241               | 4253901               | 1                            | 5                            |
| T2    | TCGAGGTCTTAGGAGTGGGA           | AGCCAGGGTGACATTCATCA           | 1   | 136466406             | 136471456             | 1                            | 4                            |
| T3    | GCTGAGGAAATAAGGATGGGG          | TGGTGCAGCTAGTGTCTCAT           | 1   | 136467589             | 136471497             | 1                            | 4                            |
| T4    | GGCGGCTCCCAACAATTATT           | GCAAACAGGTCAGCAGAGAG           | 2   | 118554779             | 118546901             | 1                            | 3                            |
| T5    | AGGAGTTGGGAGGAAGAGGA           | CGGGAACACATAGCAACAGG           | 8   | 70902292              | 70913172              | 1                            | 5                            |
| T6    | CTCAAACACAGCTGTCCACC           | TCGTCACACCTGCACAAAAG           | 16  | 13769162              | 13715551              | 1                            | 6                            |
| T7    | GAGCAACCTGGTAAGCAGTG           | GGAGGCTGGTTTGAATTCGG           | 7   | 16955576              | 16960649              | 1                            | 3                            |
| T8    | AGAGGGAATGCCTGTGGATC           | CGGGGTGTTTCTTCTTCGTT           | 13  | 95546471              | 95514039              | 1                            | 4                            |
| T9    | GAGGTCTTAGGATCCCGTGG           | GGGGCGGTTTATGAATACCC           | 13  | 93285074              | 93300740              | 1                            | 3                            |
| T10   | GCTACTGTGCCGAATGTGAG           | CAGTGGTAGGCAGGTGACAG           | 7   | 17685539              | 17714810              | 1                            | 3                            |
| T11   | AGCCTTGCTGGAGATGAAT            | AAGTGAAGCTGGGCAGACA            | 4   | 11734374              | 11767778              | 1                            | 2                            |
| T12   | CAGATGACCCTGGCCAGTAG           | GTTGAACTGCTGCTAACCGT           | 4   | 48506897              | 48468813              | 1                            | 4                            |
| L1    | AGAAGAATCCCAACCCGT             | TGAATTATCCAGGGGCTCAG           | 10  | 31657098              | 31646408              | 1                            | 2                            |
| L2    | TGCTGACTTCTCCACACAT            | TCAACCCTGATAGTGGCTCC           | 10  | 38804243              | 38785926              | 1                            | 4                            |
| L3    | TGACATTATGGATGTGGCT            | TGTCACCTCGAGTAGAAATCTGT        | 1   | 117605633             | 117625513             | 1                            | 2                            |
| L4    | TCATCCAACCCAGCTTCTCC           | AGAGTGTGGCCTTCTCC              | 5   | 62006230              | 62013483              | 1                            | 2                            |
| L5    | TCACTGGACCAATCAGCCTT           | CAGGCATGTTGGATCTGTGC           | 1   | 4170278               | 4147832               | 1                            | 4                            |
| L6    | TTCCTCTGCCATGCCATACT           | CCCAGAGTTTCCCCTGTCTAT          | 1   | 18335922              | 18339445              | 1                            | 2                            |
| L7    | GTCTGTTGAGCTGGTTGTCC           | GAGTCTCTGGTGTGTGGGAA           | 13  | 99826281              | 99761604              | 1                            | 4                            |
| M1    | CGGTGCCAGCATAATGTTCA           | GGACAGAGCCCTCATCAGAA           | 1   | 5438579               | 5438363               | n/a                          | n/a                          |
| M2    | AGCACCTTCTCAGCCATCT            | TCTGAGAAGCTGCAAGTGGA           | 1   | 21330669              | 21330428              | n/a                          | n/a                          |
| M3    | GACAGGAGAGAAACGCCCT            | CAGTCCGTACCACATCGTA            | 1   | 37542544              | 37542928              | n/a                          | n/a                          |
| M4    | AGCCAGAATCCTTCAGTGCT           | AGGAGATGGAGGGAGAGGTT           | 9   | 98888570              | 98888823              | n/a                          | n/a                          |
| M5    | GTCAGCAAAGGGTCACATGG           | CATCCCAGAGGTTCCAGAGG           | 5   | 137930578             | 137930841             | n/a                          | n/a                          |
| M6    | AAGACCCTACGGCCTAATGG           | TTTGTGCGGTTTGAGGTAGC           | 13  | 101357520             | 101357820             | n/a                          | n/a                          |
| M7    | TGAGGCATGGCGATCTTTTG           | GGTGGCTAGAACACCTCT             | 13  | 101345938             | 101346354             | n/a                          | n/a                          |

\* Ts are transcripts starting at upstream TSSs of reference genes, Ls novel multiexonic genes and Ms novel monoexonic genes

\*\* Numbers indicate the order of the exons within transcript structure from 5' end to 3' end
